# Supplementary material
Source: PubMed Central journal article supplement (PMC2663301)
Supplement: supp_29_8_2322__1.pdf [file supp_29_8_2322__1.pdf]

Supplementary table 1:

| Name                                           | Sequence                                          |
|------------------------------------------------|---------------------------------------------------|
| Large-Maf binding site on the PC2 promoter     | gcaggtgcagcgctgactctagaggagtctc                   |
| Beta2/NeuroD1 binding site on the PC2 promoter | ggacccgggcagccagctgggcaggggaggg                   |
| Beta2/NeuroD1 binding site on the 7B2 promoter | aaaatgtcctttccatctgcattttgtcagcaata               |
| Pax6-1 binding site on the 7B2 promoter        | tcacaaaatagaagtccaggctgttttaggtaag                |
| Pax6-2 binding site on the 7B2 promoter        | ggagctgagcaacattccaggcctgagacgcaggc               |
| Large-Maf binding site on the 7B2 promoter     | ggttcggagggaggtgacgcaggagctatccagc                |
| mut Maf/PC2                                    | ctgggatgcaggtgcagcAcGAGcGAtagaggagtctctaag        |
| mut Beta2/PC2                                  | ccggggaccgggcagAAGAGAgggcaggggagggcgggg           |
| mut Beta2/7B2                                  | aatgtcctttcAGGAGgcattttgtcagcaataaaaggcttcac      |
| mut Pax6-1/7B2                                 | ccgttggtatcacaaaatagaagttAAGAgctctAttttaggtaagttc |
| mut Pax6-2/7B2                                 | cagttggagctgagcaacattAAGAgcctAagacgcagggcctg      |
| mut MAF/7B2                                    | gaggrtttcggagggaggGAGAgcaAACgctatccagcacgtcagc    |

**Supplementary Table 1:** The table lists the sequences of the different oligonucleotides used in the present work for EMSA studies and site directed mutagenesis. The mutations of the consensus sequence are indicated in capital letters.

Supplementary table 2:

| Name                                      | Sequence                                         | Position on the mouse promoter |
|-------------------------------------------|--------------------------------------------------|--------------------------------|
| Maf binding on the PC2 promoter           | ccgggttctctctgtgt and gctcttctctcctcttt          | (-800) to (-600)bp             |
| Beta2/NeuroD1 binding on the PC2 promoter | gctggactgccagatgttag and gcatcctctagagggtgactcat | (-586) to (-484)bp             |
| Beta2/NeuroD1 binding on the 7B2 promoter | gtatgctctgctctttatcctg and gttgctggctgtgtagttgac | (-1135) to (-934)bp            |
| Pax6-1 binding on the 7B2 promoter        | ggctttgcagcattgtactg and tacccegcacttaagccc      | (-610) to (-375)bp             |
| Pax6-2 binding on the 7B2 promoter        | ggaggtaatgacgttcatagg and ggatagctcctgcgtcacc    | (-245) to (-26)bp              |
| Maf binding on the 7B2 promoter           | ctgcaatgccttcaggaattc and cccacaccaaggaacc       | (-126) to (+115)bp             |

**Supplementary Table 2:** The table lists the sequences of the different oligonucleotides used in the present work for CHIP studies. Their positions are evaluated relative to transcription start site (+1) on mRNA sequences.
